# Supplementary material
Source: PubMed Central journal article supplement (PMC3928501)
Supplement: NIHMS548944-supplement-supplementary_data.pdf [file NIHMS548944-supplement-supplementary_data.pdf]

# **CHEMISTRY**

---

## **A EUROPEAN JOURNAL**

---

### Supporting Information

© Copyright Wiley-VCH Verlag GmbH & Co. KGaA, 69451 Weinheim, 2013

#### **Synthesis, Characterization, and Reactivity of Cobalt(III)–Oxygen Complexes Bearing a Macrocyclic N-Tetramethylated Cyclam Ligand**

**Doyeon Kim,<sup>[a]</sup> Jaeheung Cho,<sup>[a, b]</sup> Yong-Min Lee,<sup>[a]</sup> Ritimukta Sarangi,<sup>[c]</sup> and  
Wonwoo Nam<sup>\*[a]</sup>**

chem\_201300107\_sm\_miscellaneous\_information.pdf

**Table S1.** Crystal data and structure refinements for [Co(15-TMC)(CH<sub>3</sub>CN)<sub>2</sub>](ClO<sub>4</sub>)<sub>2</sub> and [Co(15-TMC-CH<sub>2</sub>-O)(OH)](ClO<sub>4</sub>)·CH<sub>3</sub>CN.

|                                                      | [Co(15-TMC)(CH <sub>3</sub> CN) <sub>2</sub> ](ClO <sub>4</sub> ) <sub>2</sub> | [Co(15-TMC-CH <sub>2</sub> -O)(OH)](ClO <sub>4</sub> )·CH <sub>3</sub> CN |
|------------------------------------------------------|--------------------------------------------------------------------------------|---------------------------------------------------------------------------|
| Empirical formula                                    | C <sub>19</sub> H <sub>0</sub> Cl <sub>2</sub> CoN <sub>6</sub> O <sub>8</sub> | C <sub>17</sub> H <sub>37</sub> ClCoN <sub>5</sub> O <sub>6</sub>         |
| Formula weight                                       | 570.08                                                                         | 501.90                                                                    |
| Temperature (K)                                      | 170(2)                                                                         | 170(2)                                                                    |
| Wavelength (Å)                                       | 0.71073                                                                        | 0.71073                                                                   |
| Crystal system/space group                           | Monoclinic, <i>P2(1)/n</i>                                                     | Monoclinic, <i>P2(1)/c</i>                                                |
| Unit cell dimensions                                 |                                                                                |                                                                           |
| <i>a</i> (Å)                                         | 8.6493(8)                                                                      | 9.6291(3)                                                                 |
| <i>b</i> (Å)                                         | 15.6174(13)                                                                    | 19.6761(6)                                                                |
| <i>c</i> (Å)                                         | 10.7612(9)                                                                     | 12.0095(4)                                                                |
| <i>α</i> (°)                                         | 90.00                                                                          | 90.00                                                                     |
| <i>β</i> (°)                                         | 111.2190(10)                                                                   | 98.974(2)                                                                 |
| <i>γ</i> (°)                                         | 90.00                                                                          | 90.00                                                                     |
| Volume (Å <sup>3</sup> )                             | 1355.1(2)                                                                      | 2247.51(12)                                                               |
| <i>Z</i>                                             | 2                                                                              | 4                                                                         |
| Calculated density (g/cm <sup>-3</sup> )             | 1.397                                                                          | 1.483                                                                     |
| Absorption coefficient (mm <sup>-1</sup> )           | 0.880                                                                          | 0.925                                                                     |
| Reflections collected                                | 7479                                                                           | 29048                                                                     |
| Independent reflections [ <i>R</i> (int)]            | 2636 [0.1214]                                                                  | 4263 [0.0349]                                                             |
| Refinement method                                    | Full-matrix<br>least-squares on <i>F</i> <sup>2</sup>                          | Full-matrix<br>least-squares on <i>F</i> <sup>2</sup>                     |
| Data/restraints/parameters                           | 2636/0/179                                                                     | 4263/0/276                                                                |
| Goodness-of-fit on <i>F</i> <sup>2</sup>             | 1.080                                                                          | 1.104                                                                     |
| Final <i>R</i> indices [ <i>I</i> > 2σ( <i>I</i> )]  | <i>R</i> <sub>1</sub> = 0.0865,<br><i>wR</i> <sub>2</sub> = 0.2603             | <i>R</i> <sub>1</sub> = 0.0699,<br><i>wR</i> <sub>2</sub> = 0.2470        |
| <i>R</i> indices (all data)                          | <i>R</i> <sub>1</sub> = 0.0941,<br><i>wR</i> <sub>2</sub> = 0.2671             | <i>R</i> <sub>1</sub> = 0.0875,<br><i>wR</i> <sub>2</sub> = 0.2671        |
| Largest difference peak and hole (e/Å <sup>3</sup> ) | 1.282 and -1.048                                                               | 0.941 and -0.612                                                          |

**Table S2.** Selected bond distances (Å) and angles (°) for [Co(15-TMC)(CH<sub>3</sub>CN)<sub>2</sub>](ClO<sub>4</sub>)<sub>2</sub> and [Co(15-TMC-CH<sub>2</sub>-O)(OH)](ClO<sub>4</sub>)·CH<sub>3</sub>CN.

| Bond Distances (Å)                                                             |           |                                                          |            |
|--------------------------------------------------------------------------------|-----------|----------------------------------------------------------|------------|
| [Co(15-TMC)(CH <sub>3</sub> CN) <sub>2</sub> ](ClO <sub>4</sub> ) <sub>2</sub> |           | [Co(15-TMC-O)(OH)](ClO <sub>4</sub> )·CH <sub>3</sub> CN |            |
| Co1-N1                                                                         | 2.216(4)  | Co1-N1                                                   | 1.988(5)   |
| Co1-N2                                                                         | 2.225(4)  | Co1-N2                                                   | 2.125(5)   |
| Co1-N3                                                                         | 2.165(5)  | Co1-N3                                                   | 2.089(4)   |
|                                                                                |           | Co1-N4                                                   | 2.082(5)   |
|                                                                                |           | Co1-O1                                                   | 1.896(3)   |
|                                                                                |           | Co1-O2                                                   | 1.878(4)   |
| Bond Angles (°)                                                                |           |                                                          |            |
| [Co(15-TMC)(CH <sub>3</sub> CN) <sub>2</sub> ](ClO <sub>4</sub> ) <sub>2</sub> |           | [Co(15-TMC-O)(OH)](ClO <sub>4</sub> )·CH <sub>3</sub> CN |            |
| N1-Co1-N2                                                                      | 89.40(19) | N1-Co1-N2                                                | 91.1(2)    |
| N1-Co1-N3                                                                      | 91.56(18) | N1-Co1-N3                                                | 171.10(18) |
| N2-Co1-N3                                                                      | 88.44(18) | N1-Co1-N4                                                | 85.0(2)    |
|                                                                                |           | N2-Co1-N3                                                | 92.0(2)    |
|                                                                                |           | N2-Co1-N4                                                | 175.5(2)   |
|                                                                                |           | N3-Co1-N4                                                | 92.2(2)    |
|                                                                                |           | N1-Co1-O1                                                | 74.04(18)  |
|                                                                                |           | N2-Co1-O1                                                | 91.24(16)  |
|                                                                                |           | N3-Co1-O1                                                | 97.56(16)  |
|                                                                                |           | N4-Co1-O1                                                | 89.87(15)  |
|                                                                                |           | N1-Co1-O2                                                | 100.09(19) |
|                                                                                |           | N2-Co1-O2                                                | 85.73(18)  |
|                                                                                |           | N3-Co1-O2                                                | 88.46(17)  |
|                                                                                |           | N4-Co1-O2                                                | 92.71(17)  |
|                                                                                |           | Co1-O1-C1                                                | 92.7(3)    |
|                                                                                |           | O1-Co1-O2                                                | 173.36(17) |

**Table S3.** Co-K Pre-edge analysis for **1**, **2**, and **3**.

|          | Pre-edge (1s→3d) (eV) <sup>a</sup> | Co K rising-edge (eV) <sup>b</sup> |
|----------|------------------------------------|------------------------------------|
| <b>1</b> | 7709.3(0.04) <sup>c</sup>          | 7720.4                             |
| <b>2</b> | 7710.2(0.02)                       | 7721.2                             |
| <b>3</b> | 7710.2(0.02)                       | 7721.0                             |

<sup>a</sup>Intensity weighted average energy of pre-edge multiplet features. <sup>b</sup>Energy position of first inflection point.

<sup>c</sup>Values in parentheses are the statistical standard deviations calculated from the individual acceptable fits used in the analysis. Fits performed using Edg-Fit (a peak fitting routine in EXAFSPAK, reference 6)

**Table S4.** EXAFS least squares fitting results for **2** and **3**.

| Complex  | Coordination/Path      | R(Å) <sup>a</sup> | σ <sup>2</sup> (Å <sup>2</sup> ) <sup>b</sup> | E <sub>0</sub> (eV) | F <sup>c</sup> |
|----------|------------------------|-------------------|-----------------------------------------------|---------------------|----------------|
| <b>2</b> | 2 Co-O                 | 1.89              | 154                                           | -1.88               | 0.18           |
|          | 4 Co-N                 | 2.07              | 809                                           |                     |                |
|          | 1 Co-N                 | 2.40              | 784                                           |                     |                |
|          | 8 Co-C <sup>d</sup>    | 2.94              | 1150                                          |                     |                |
|          | 16 Co-C-N <sup>d</sup> | 3.23              | /1150                                         |                     |                |
|          | 4 Co-C                 | 3.49              | 340                                           |                     |                |
| <b>3</b> | 1 Co-O                 | 1.86              | 176                                           | -4.8                | 0.13           |
|          | 4 Co-N                 | 2.04              | 742                                           |                     |                |
|          | 1 Co-N                 | 2.19              | 164                                           |                     |                |
|          | 8 Co-C                 | 3.04              | 1851                                          |                     |                |
|          | 16 Co-C-N              | 3.32              | /1851                                         |                     |                |
|          | 4 Co-C                 | 3.47              | 644                                           |                     |                |
|          | 2 Co-C-N               | 3.25              | 342                                           |                     |                |
|          | 1 Co-C-N-C             | /3.25             | /342                                          |                     |                |

<sup>a</sup>The estimated standard deviations for the distances are in the order of ± 0.02 Å. <sup>b</sup>The σ<sup>2</sup> values are multiplied by 10<sup>5</sup>. <sup>c</sup>Error is given by  $\Sigma[(\chi_{\text{obsd}} - \chi_{\text{calcd}})^2 k^6] / \Sigma[(\chi_{\text{obsd}})^2 k^6]$ . / indicates the σ<sup>2</sup> value for the path is linked to the preceding path. The S<sub>0</sub><sup>2</sup> factor was set at 1.

**Table S5.** Kinetic data obtained in the conversion of **3** (4.0 mM) to **4** performed with different amounts of HClO<sub>4</sub>.

| Amount of HClO <sub>4</sub> | $k_{\text{obs}}, \text{ s}^{-1}$ |
|-----------------------------|----------------------------------|
| 40 mM                       | $3.9(4) \times 10^{-3}$          |
| 120 mM                      | $3.9(3) \times 10^{-3}$          |
| 240 mM                      | $4.0(3) \times 10^{-3}$          |

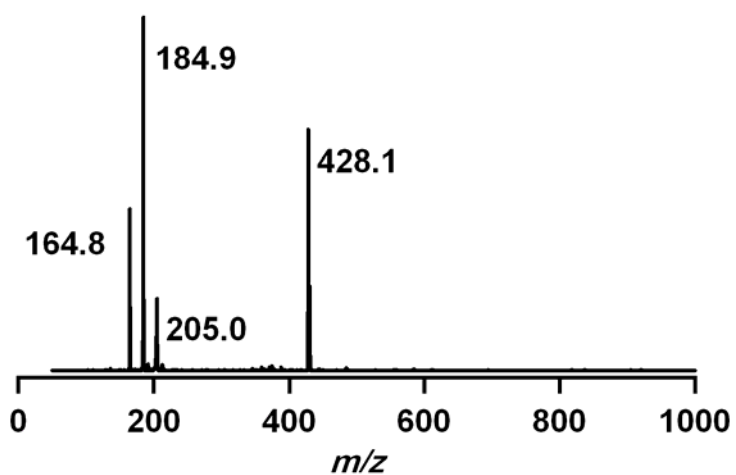

**Figure S1.** ESI MS of **1** in  $\text{CH}_3\text{CN}$ : Mass peaks at  $m/z$  of 164.8, 184.9, 205.0, and 428.1 are assigned to  $[\text{Co}(15\text{-TMC})]^{2+}$ ,  $[\text{Co}(15\text{-TMC})(\text{CH}_3\text{CN})]^{2+}$ ,  $[\text{Co}(15\text{-TMC})(\text{CH}_3\text{CN})_2]^{2+}$ , and  $[\text{Co}(15\text{-TMC})(\text{ClO}_4)]^+$ , respectively.

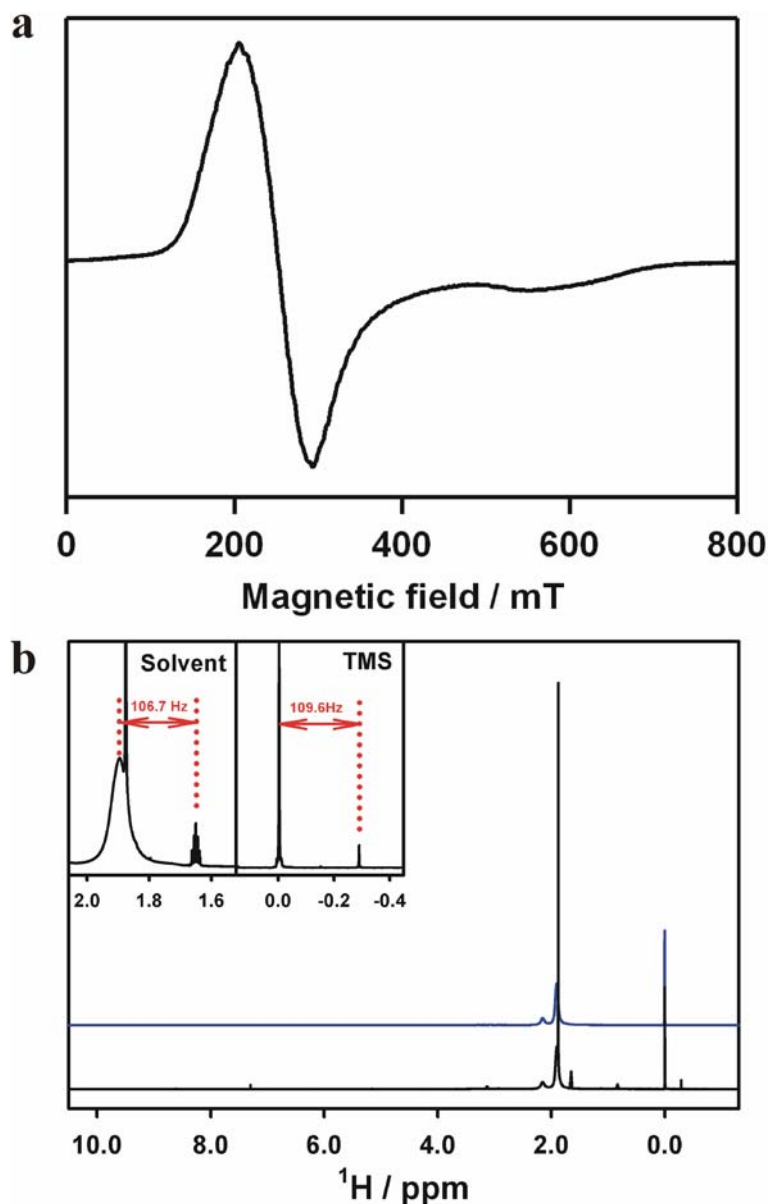

**Figure S2.** (a) X-band EPR spectrum of **1** ( $g$  values of 4.6 and 2.3) in frozen  $\text{CH}_3\text{CN}$  at 4.3 K. Instrumental parameters: microwave power = 1.0 mW, frequency = 9.101 GHz, sweep width = 0.5 T, modulation amplitude = 0.2 mT. (b)  $^1\text{H}$  NMR spectra of **1** (8.0 mM) with common (blue) and Evans (black) techniques at 298 K. Insets show that the  $\Delta\nu$  values of solvent and TMS peaks were 106.7 and 109.6 Hz, respectively. The magnetic moment of **1** determined to be 4.4(2) B.M. from both  $\Delta\nu$  values indicates spin state of  $S = 3/2$  for **1**.



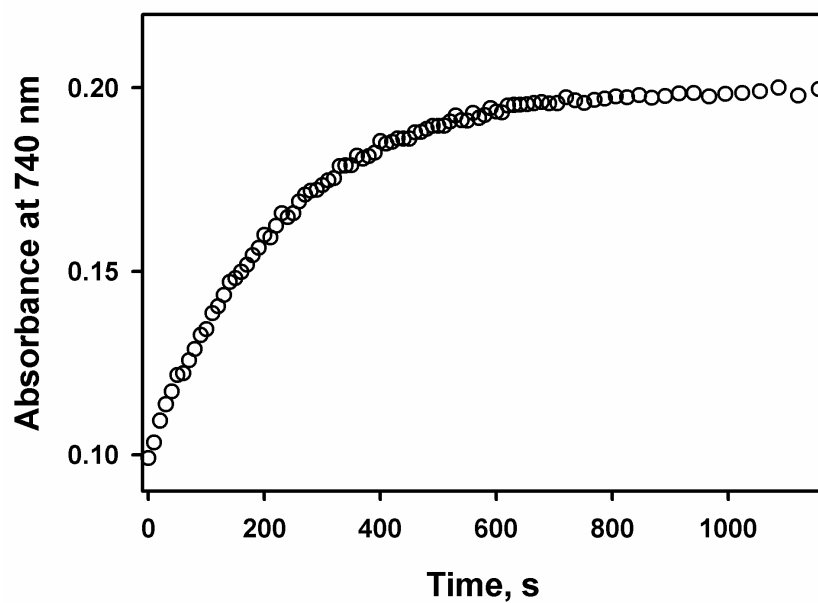

**Figure S3.** Time trace monitored at 740 nm in the conversion of **3** to **4** in CH<sub>3</sub>CN at 0 °C.

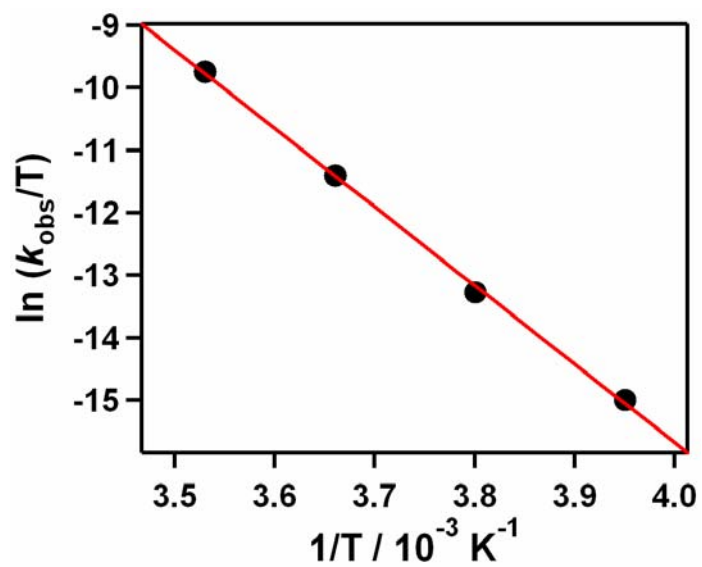

**Figure S4.** Plot of first-order rate constants against  $1/T$  to determine activation parameters for the conversion of **3** to **4**.
